# Supplementary material for: Silver incorporated SeTe nanoparticles with enhanced photothermal and photodynamic properties for synergistic effects on anti-bacterial activity and wound healing
Source: Royal Society of Chemistry journal article supplement (doi:10.1039/d4ra01343c), 2024-01-01
Supplement: d4ra01343c1.pdf [file d4ra01343c1.pdf]

## Supporting information

### **Silver incorporated SeTe nanoparticles with enhanced photothermal and photodynamic properties for synergistic effects on anti-bacteria and wound healing**

Irfan Ullah,<sup>ad</sup> Shahin Shah Khan,<sup>ad</sup> Waqar Ahmad,<sup>a</sup> Luo Liu,<sup>a</sup> Ahmed Rady,<sup>b</sup> Badr Aldahmash,<sup>b</sup> Changyuan Yu,<sup>\*a</sup> and Yushu Wang<sup>\*c</sup>

<sup>a</sup> College of Life Science and Technology

Beijing University of Chemical Technology

Beijing 100029, China

Email: yucy@mail.buct.edu.cn

<sup>b</sup> Department of Zoology, College of Science

King Saud University

P.O. Box 2455, Riyadh 11451, Saudi Arabia.

<sup>c</sup> School of Pharmaceutical Sciences

Southern Medical University

No. 1023, South Shatai Road

Guangzhou 510515, China

Email: wysmjeda@gmail.com

<sup>d</sup> I. Ullah and S. S. Khan contributed equally to this work.

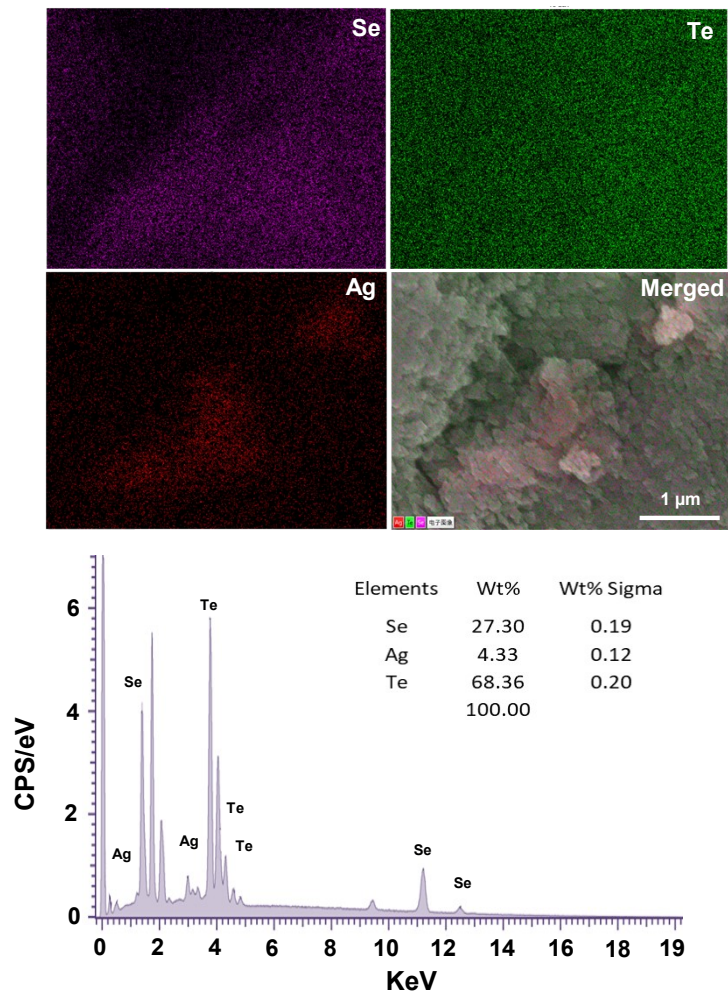

**Fig. S1.** Representative elements of Se, Te, and Ag mapping images and EDS spectra of SeTe-Ag NPs.

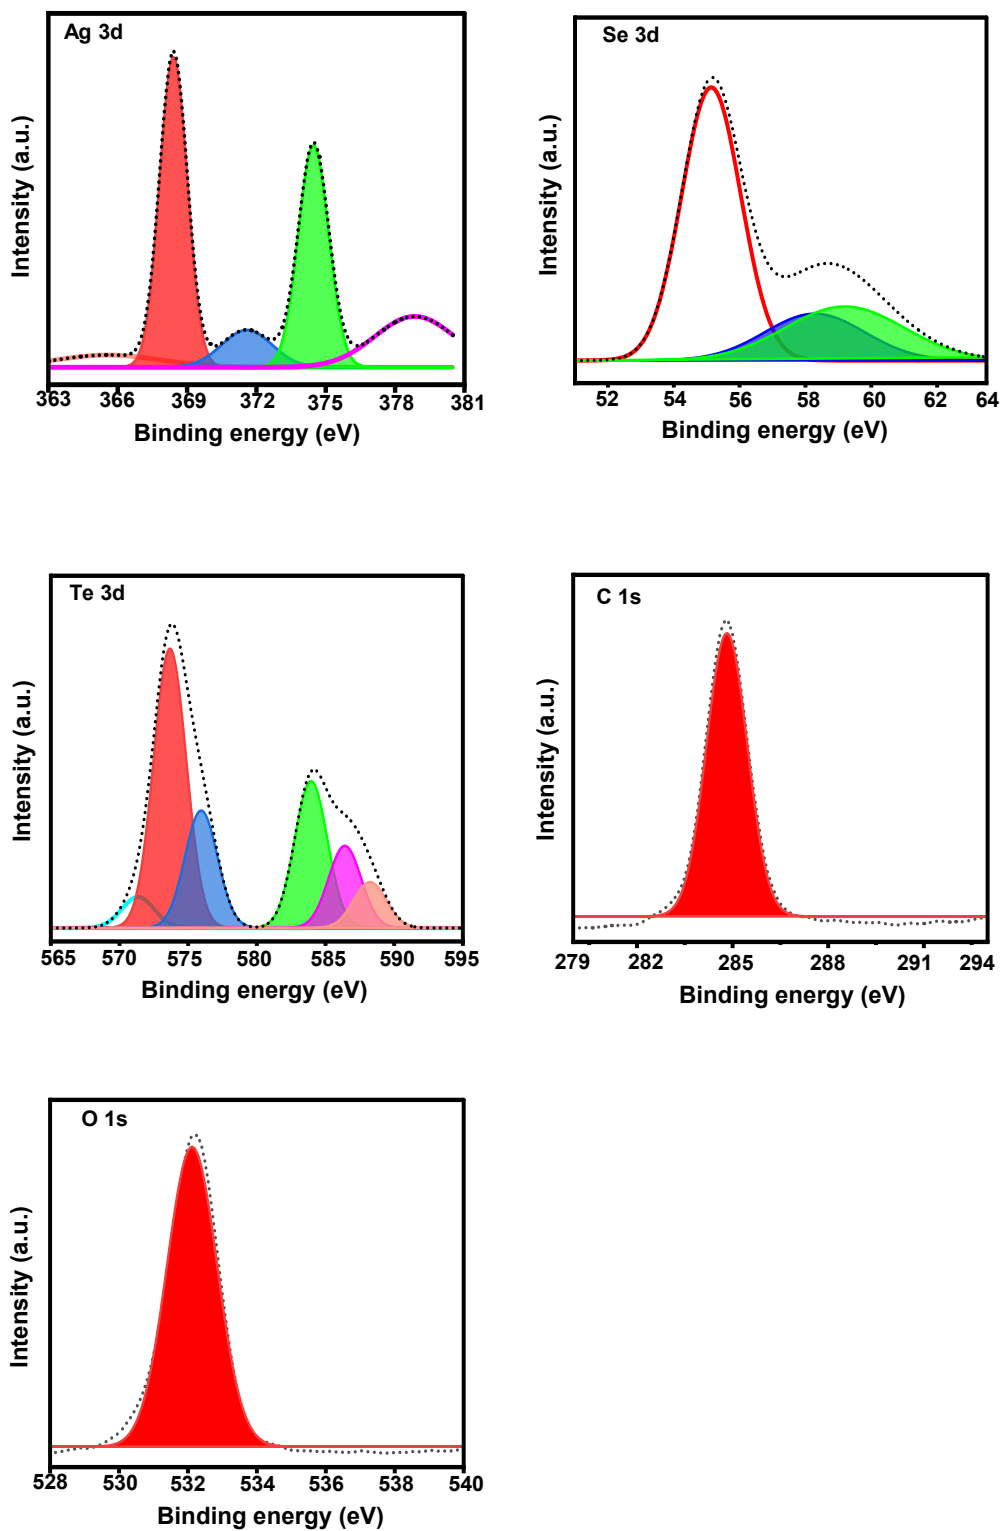

**Fig. S2.** XPS elemental spectra of Ag 3d, Se 3d, Te 3d, C1s and O1s of SeTe-Ag NPs.

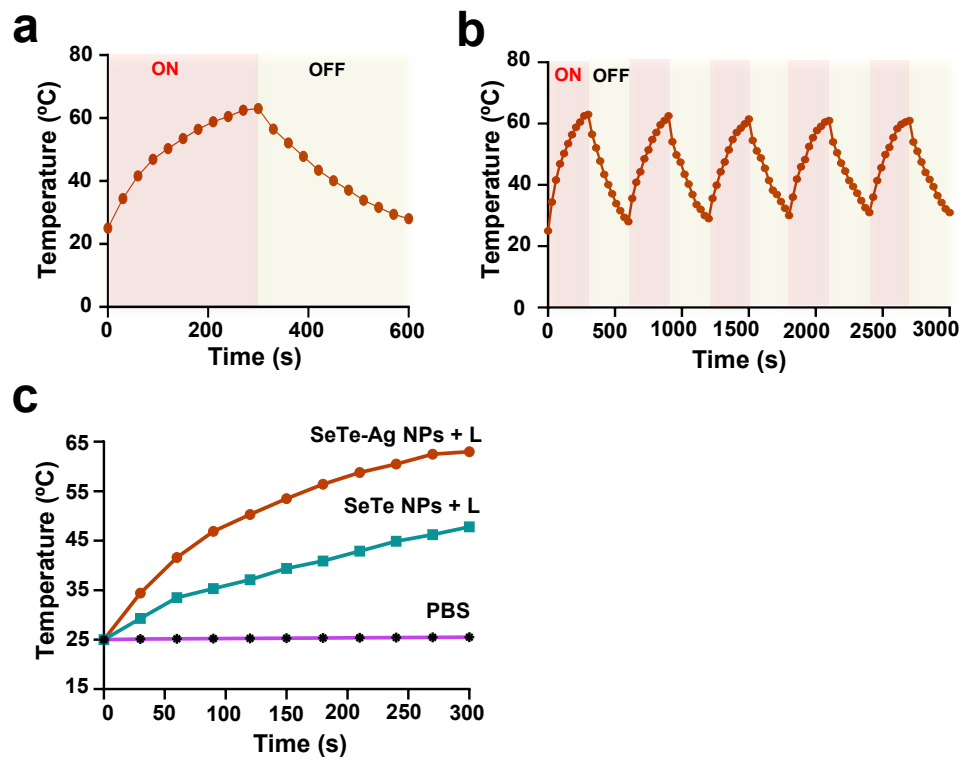

**Fig. S3.** Photothermal performance of SeTe-Ag NPs. (a, b) Single and five cycles of heating and cooling of SeTe-Ag NPs with NIR laser irradiation for five minutes ON and then OFF, and (b) comparative study of PBS, SeTe NPs and SeTe-Ag NPs after NIR laser irradiation.

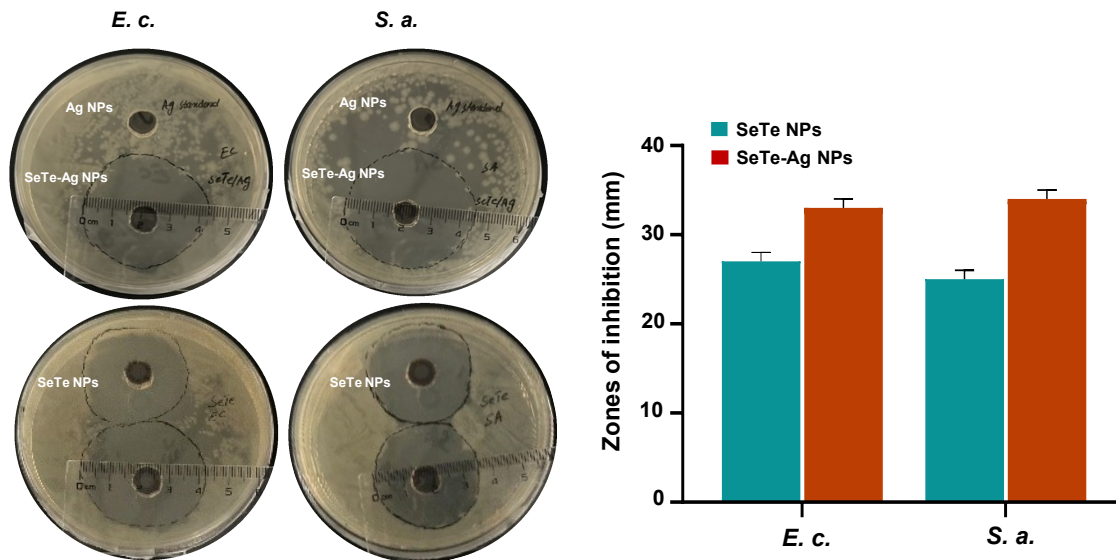

**Fig. S4.** Representative images and quantitative results for the zones of inhibitions of Ag NPs, SeTe NPs and SeTe-Ag NPs against *E. coli* and *S. aureus*.

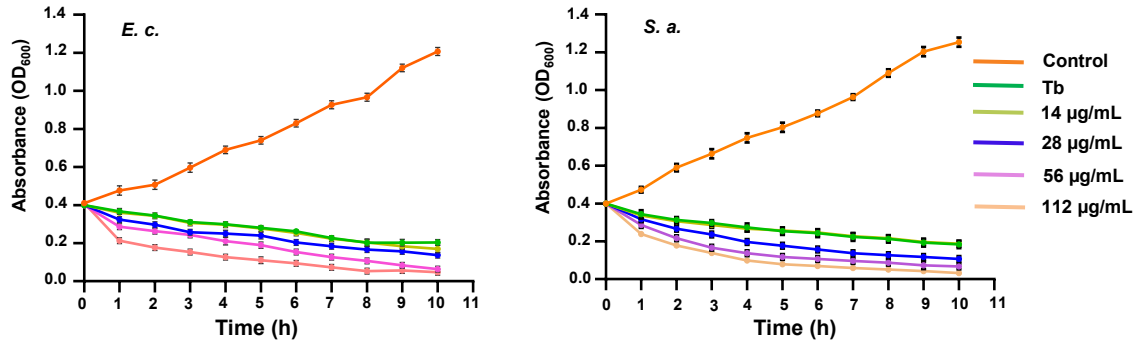

**Fig. S5.** Growth curves pattern of *E. coli* and *S. aureus* under the influence of tobramycin (Tb) in comparison with different concentrations of SeTe-Ag NPs.

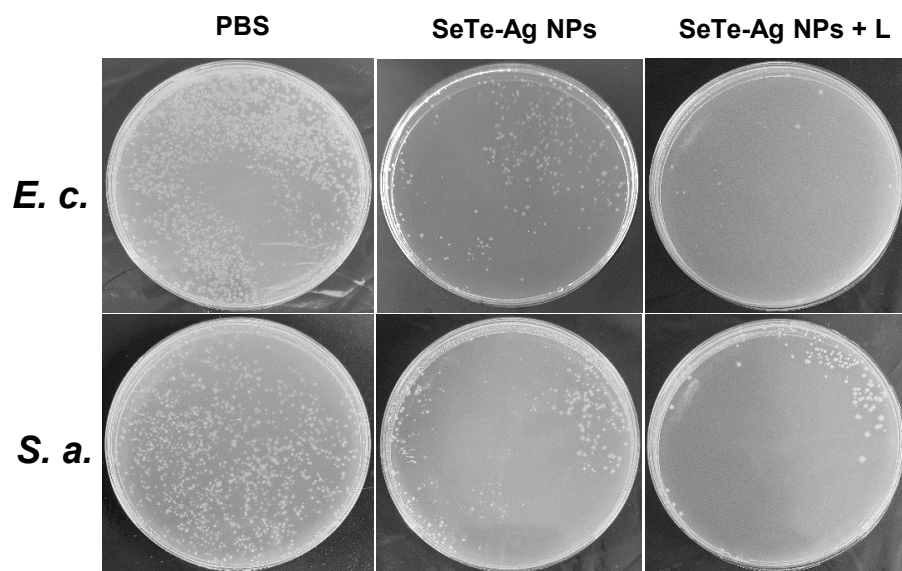

**Fig. S6.** Antibacterial activity of PBS, SeTe-Ag NPs, and SeTe-Ag NPs + L against *E. coli* and *S. aureus* using agar plate method.

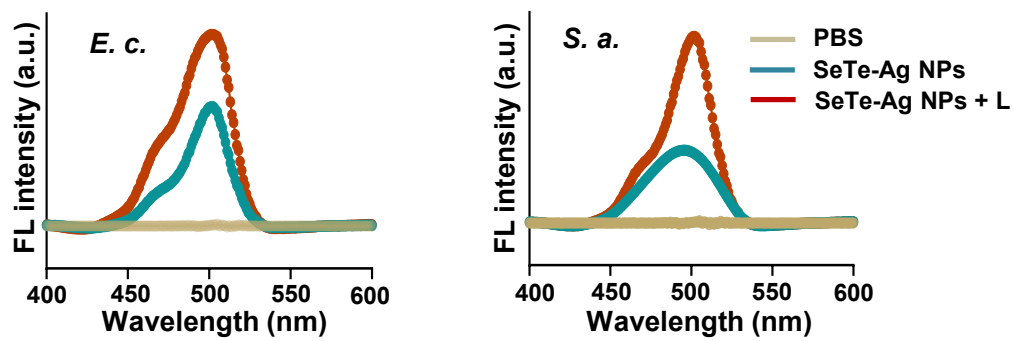

**Fig. S7.** Fluorescence (FL) intensity of bacterial intracellular ROS generation after treatment with PBS, SeTe-Ag NPs, and SeTe-Ag NPs + L.



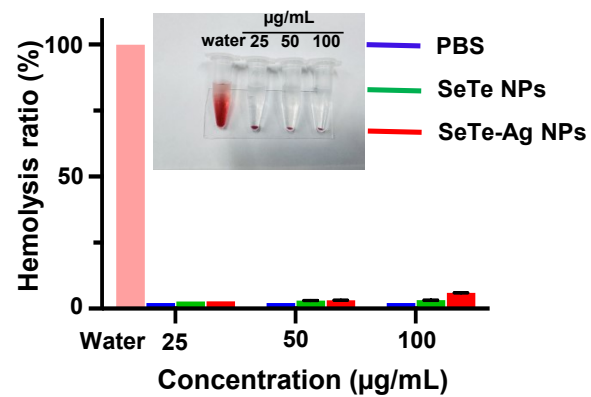

**Fig. S8.** Hemolysis ratio of SeTe NPs and SeTe-Ag NPs at different concentration.

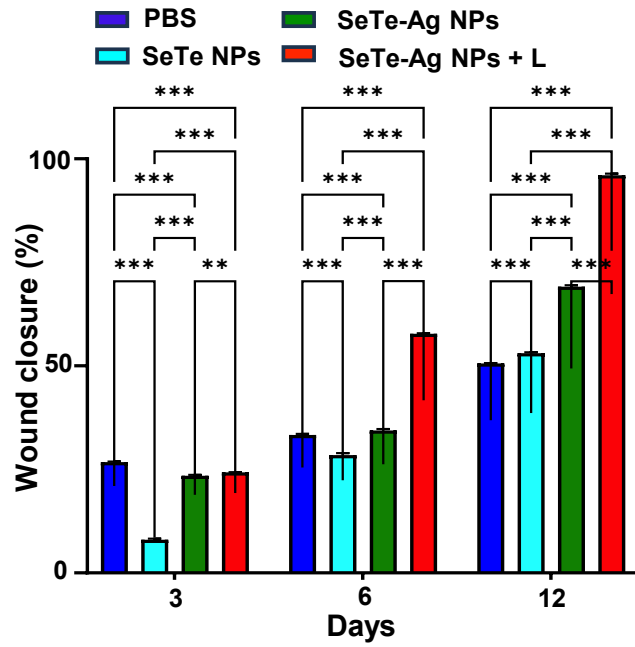

**Fig. S9.** Wound closure percentage of the healing wound after treatment with PBS, SeTe NPs, SeTe-Ag NPs and SeTe-Ag NPs + L.

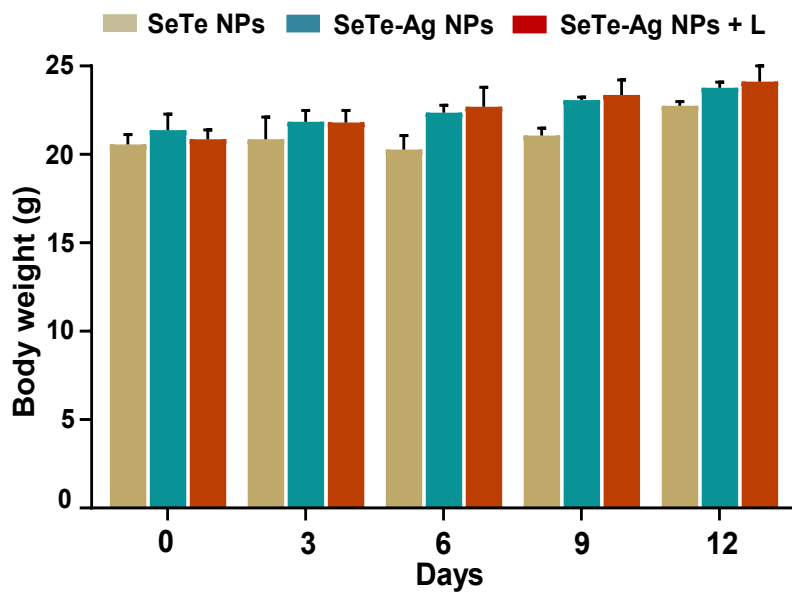

**Fig. S10.** Body weight of mice after treatment with SeTe NPs, SeTe-Ag NPs, and SeTe-Ag NPs + L on different days.

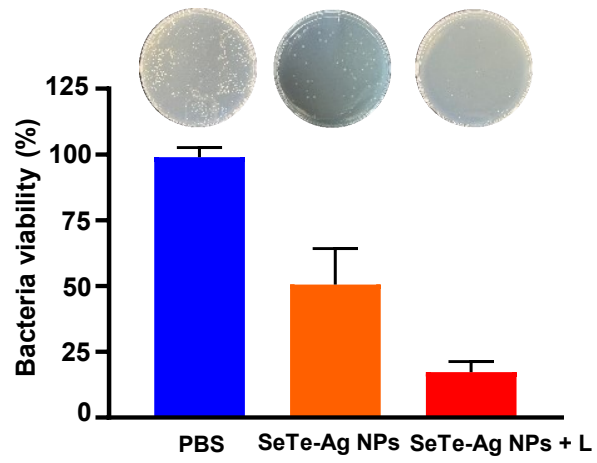

**Fig. S11.** Representative images and quantitative results of the bacteria from wound tissues of PBS, SeTe-Ag NPs, and SeTe-Ag NPs + L treatment groups.
